# Supplementary material for: Clinical behavior and outcomes of breast cancer in young women with germline BRCA pathogenic variants
Source: PubMed Central journal article supplement (PMC7880991; doi:10.1038/s41523-021-00224-w), 2021-02-12
Supplement: 41523_2021_224_MOESM1_ESM.pdf [file 41523_2021_224_MOESM1_ESM.pdf]

## ONLINE DATA SUPPLEMENTS

**Supplementary Figure 1.** Study profile.

**Supplementary Table 1.** Use of prophylactic surgery comparing between patients with germline *BRCA1* and *BRCA2* pathogenic variants.

**Supplementary Table 2.** Patient, tumor and treatment characteristics comparing between patients with germline *BRCA1* and *BRCA2* pathogenic variants according to hormone receptor status.

**Supplementary Table 3.** Use of prophylactic surgery comparing between patients with germline *BRCA1* and *BRCA2* pathogenic variants according to hormone receptor status.

**Supplementary Table 4.** Pattern of invasive disease-free survival events comparing between patients with germline *BRCA1* and *BRCA2* pathogenic variants according to hormone receptor status.

**Supplementary Table 5.** Disease-free survival comparing between patients with germline *BRCA1* and *BRCA2* pathogenic variants according to hormone receptor status.

**Supplementary Table 6.** Distant recurrence-free interval comparing between patients with germline *BRCA1* and *BRCA2* pathogenic variants according to hormone receptor status.

**Supplementary Table 7.** Overall survival comparing between patients with germline *BRCA1* and *BRCA2* pathogenic variants according to hormone receptor status.

**Supplementary Table 8.** Patient, tumor and treatment characteristics comparing between patients with hormone receptor-positive and negative breast cancer.

**Supplementary Table 9.** Use of prophylactic surgery comparing between patients with hormone receptor-positive and negative breast cancer.

**Supplementary Table 10.** Survival outcomes comparing between patients with hormone receptor-positive and negative breast cancer.

**Supplementary Table 11.** Patient, tumor and treatment characteristics comparing between patients with hormone receptor-positive and negative breast cancer (by including only patients for whom the 1% cut-off for estrogen and/or progesterone receptor expression in their tumor was used to define hormone receptor status).

**Supplementary Table 12.** Use of prophylactic surgery comparing between patients with hormone receptor-positive and negative breast cancer (by including only patients for whom the 1% cut-off for estrogen and/or progesterone receptor expression in their tumor was used to define hormone receptor status).

**Supplementary Table 13.** Pattern of invasive disease-free survival events according to hormone receptor status (by including only patients for whom the 1% cut-off for estrogen and/or progesterone receptor expression in their tumor was used to define hormone receptor status).

**Supplementary Table 14.** Survival outcomes comparing between patients with hormone receptor-positive and negative breast cancer (by including only patients for whom the 1% cut-off for estrogen and/or progesterone receptor expression in their tumor was used to define hormone receptor status).

**Supplementary Figure 2.** Comparison between patients with hormone receptor-positive and negative disease: Epanechnikov Kernel-Smoothed annual hazards of recurrence overall.

**Supplementary Figure 3.** Comparison between patients with hormone receptor-positive and negative disease: Disease-free survival.

**Supplementary Figure 4.** Comparison between patients with hormone receptor-positive and negative disease: Distant recurrence-free interval.

**Supplementary Figure 5.** Comparison between patients with hormone receptor-positive and negative disease: Overall survival.

This supplementary material has been provided by the authors to give readers additional information about their work.

## Supplementary Figure 1. Study profile.

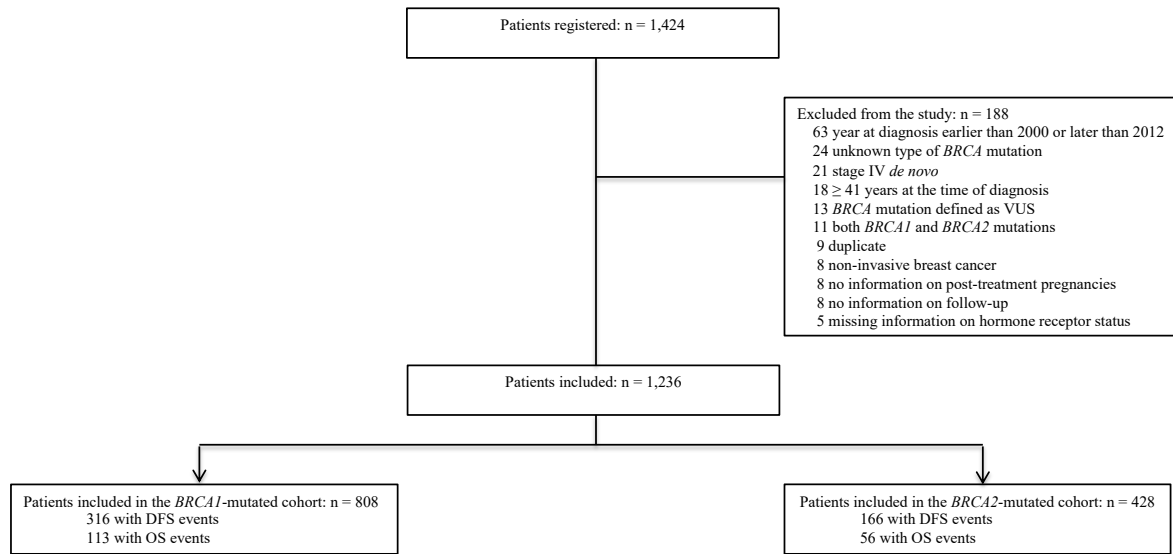

Abbreviations: VUS, variant of uncertain significance; DFS, disease-free survival; OS, overall survival.

**Supplementary Table 1. Use of prophylactic surgery comparing between patients with germline *BRCA1* and *BRCA2* pathogenic variants.**

|                                                                     | <b><i>BRCA1</i> cohort</b><br>N (%)<br>N=808 | <b><i>BRCA2</i> cohort</b><br>N (%)<br>N=428 | <b>P value<sup>a</sup></b> |
|---------------------------------------------------------------------|----------------------------------------------|----------------------------------------------|----------------------------|
| Prophylactic bilateral risk-reducing mastectomy:                    |                                              |                                              | 0.371                      |
| No                                                                  | 354 (43.8)                                   | 175 (40.9)                                   |                            |
| Yes                                                                 | 355 (43.9)                                   | 197 (46.0)                                   |                            |
| Missing                                                             | 99 (12.2)                                    | 56 (13.1)                                    |                            |
| Prophylactic bilateral risk-reducing salpingo-oophorectomy:         |                                              |                                              | 1.000                      |
| No                                                                  | 328 (40.6)                                   | 176 (41.1)                                   |                            |
| Yes                                                                 | 390 (48.3)                                   | 209 (48.8)                                   |                            |
| Missing                                                             | 90 (11.1)                                    | 43 (10.0)                                    |                            |
| Date of prophylactic bilateral risk-reducing salpingo-oophorectomy: |                                              |                                              |                            |
| Not available, N (%)                                                | 441 (54.6)                                   | 232 (54.2)                                   | 0.905                      |
| Median, months (IQR)*                                               | 53.0 (19.6-92.5)                             | 61.2 (26.1-96.3)                             | 0.088                      |

<sup>a</sup> Calculated after exclusion of missing values

\*among patients with this information available

**Supplementary Table 2. Patient, tumor and treatment characteristics comparing between patients with germline *BRCA1* and *BRCA2* pathogenic variants according to hormone receptor status.**

|                                      | Hormone receptor-positive             |                                       | P value <sup>a</sup> | Hormone receptor-negative             |                                      | P value <sup>a</sup> |
|--------------------------------------|---------------------------------------|---------------------------------------|----------------------|---------------------------------------|--------------------------------------|----------------------|
|                                      | <i>BRCA1</i> cohort<br>N (%)<br>N=191 | <i>BRCA2</i> cohort<br>N (%)<br>N=356 |                      | <i>BRCA1</i> cohort<br>N (%)<br>N=617 | <i>BRCA2</i> cohort<br>N (%)<br>N=72 |                      |
| Country:                             |                                       |                                       | 0.001                |                                       |                                      | 0.440                |
| Europe                               | 140 (73.3)                            | 302 (84.8)                            |                      | 471 (76.3)                            | 58 (80.6)                            |                      |
| North America                        | 15 (7.8)                              | 21 (5.9)                              |                      | 37 (6.0)                              | 6 (8.3)                              |                      |
| Latin America                        | 4 (2.1)                               | 10 (2.8)                              |                      | 30 (4.9)                              | 3 (4.2)                              |                      |
| Israel                               | 32 (16.8)                             | 23 (6.5)                              |                      | 79 (12.8)                             | 5 (6.9)                              |                      |
| Year at diagnosis:                   |                                       |                                       | 0.451                |                                       |                                      | 0.565                |
| 2000-2004                            | 36 (18.8)                             | 84 (23.6)                             |                      | 131 (21.2)                            | 13 (18.1)                            |                      |
| 2005-2008                            | 68 (35.6)                             | 118 (33.1)                            |                      | 236 (38.2)                            | 25 (34.7)                            |                      |
| 2009-2012                            | 87 (45.5)                             | 154 (43.3)                            |                      | 250 (40.5)                            | 34 (47.2)                            |                      |
| Age at diagnosis, median (IQR) years | 35 (31-38)                            | 36 (32-38)                            | 0.244                | 34 (30-37)                            | 36 (33-38)                           | 0.003                |
| Age at diagnosis:                    |                                       |                                       | 0.394                |                                       |                                      | <0.001               |
| ≤ 30 years                           | 38 (19.9)                             | 58 (16.3)                             |                      | 168 (27.2)                            | 6 (8.3)                              |                      |
| 31-35 years                          | 67 (35.1)                             | 118 (33.1)                            |                      | 214 (34.7)                            | 25 (34.7)                            |                      |
| 36-40 years                          | 86 (45.0)                             | 180 (50.6)                            |                      | 235 (38.1)                            | 41 (56.9)                            |                      |
| Histology:                           |                                       |                                       | 0.137                |                                       |                                      | 0.107                |
| Ductal carcinoma                     | 150 (78.5)                            | 286 (80.3)                            |                      | 495 (80.2)                            | 60 (83.3)                            |                      |
| Lobular carcinoma                    | 9 (4.7)                               | 28 (7.9)                              |                      | 1 (0.2)                               | 1 (1.4)                              |                      |
| Others                               | 14 (7.4)                              | 15 (4.2)                              |                      | 73 (11.8)                             | 5 (7.0)                              |                      |
| Missing                              | 18 (9.4)                              | 27 (7.6)                              |                      | 48 (7.8)                              | 6 (8.3)                              |                      |
| Tumor grade:                         |                                       |                                       | 0.043                |                                       |                                      | 0.061                |
| G1                                   | 6 (3.1)                               | 11 (3.1)                              |                      | 4 (0.6)                               | 2 (2.8)                              |                      |
| G2                                   | 50 (26.2)                             | 129 (36.2)                            |                      | 60 (9.7)                              | 11 (15.3)                            |                      |
| G3                                   | 125 (65.4)                            | 195 (54.8)                            |                      | 513 (83.1)                            | 56 (77.8)                            |                      |
| Missing                              | 10 (5.2)                              | 21 (5.9)                              |                      | 40 (6.5)                              | 3 (4.2)                              |                      |
| Tumor size:                          |                                       |                                       | 0.318                |                                       |                                      | 0.444                |
| T1 (≤ 2 cm)                          | 89 (46.6)                             | 151 (42.4)                            |                      | 242 (39.2)                            | 25 (34.7)                            |                      |
| T2-T3-T4 (> 2 cm)                    | 98 (51.3)                             | 200 (56.2)                            |                      | 361 (58.5)                            | 47 (65.3)                            |                      |
| Missing                              | 4 (2.1)                               | 5 (1.4)                               |                      | 14 (2.3)                              | 0 (0.0)                              |                      |
| Nodal status:                        |                                       |                                       | 0.001                |                                       |                                      | 0.305                |
| N0                                   | 104 (54.4)                            | 143 (40.2)                            |                      | 380 (61.6)                            | 40 (55.6)                            |                      |
| N1-N2-N3                             | 84 (44.0)                             | 209 (58.7)                            |                      | 227 (36.8)                            | 31 (43.0)                            |                      |
| Missing                              | 3 (1.6)                               | 4 (1.1)                               |                      | 10 (1.6)                              | 1 (1.4)                              |                      |
| HER2 status:                         |                                       |                                       | 0.228                |                                       |                                      | <0.001               |
| HER2 negative                        | 173 (90.6)                            | 319 (89.6)                            |                      | 587 (95.1)                            | 61 (84.7)                            |                      |
| HER2 positive                        | 10 (5.2)                              | 30 (8.4)                              |                      | 18 (2.9)                              | 10 (13.9)                            |                      |
| Missing                              | 8 (4.2)                               | 7 (2.0)                               |                      | 12 (1.9)                              | 1 (1.4)                              |                      |
| Breast surgery:                      |                                       |                                       | 0.017                |                                       |                                      | 0.102                |
|                                      | 88 (46.1)                             | 126 (35.4)                            |                      | 340 (55.1)                            | 32 (44.4)                            |                      |

|                                                    |            |            |        |            |           |       |
|----------------------------------------------------|------------|------------|--------|------------|-----------|-------|
| Breast conserving surgery                          | 101 (52.9) | 225 (63.2) |        | 271 (43.9) | 39 (54.2) |       |
| Mastectomy                                         | 2 (1.0)    | 5 (1.4)    |        | 6 (1.0)    | 1 (1.4)   |       |
| Missing                                            |            |            |        |            |           |       |
| Use of chemotherapy:                               |            |            | 0.628  |            |           | 0.363 |
| No                                                 | 14 (7.3)   | 31 (8.7)   |        | 10 (1.6)   | 2 (2.8)   |       |
| Yes                                                | 176 (92.1) | 325 (91.3) |        | 606 (98.2) | 70 (97.2) |       |
| Missing                                            | 1 (0.5)    | 0 (0.0)    |        | 1 (0.2)    | 0 (0.0)   |       |
| Type of chemotherapy*:                             |            |            | 0.682  |            |           | 0.987 |
| Anthracycline- and taxane-based                    | 116 (65.9) | 215 (66.1) |        | 410 (67.7) | 48 (68.6) |       |
| Anthracycline-based                                | 44 (25.0)  | 91 (28.0)  |        | 152 (25.1) | 19 (27.1) |       |
| Taxane-based                                       | 6 (3.4)    | 10 (3.1)   |        | 14 (2.3)   | 1 (1.4)   |       |
| Others                                             | 5 (2.8)    | 5 (1.5)    |        | 14 (2.3)   | 1 (1.4)   |       |
| Missing                                            | 5 (2.8)    | 4 (1.2)    |        | 16 (2.6)   | 1 (1.4)   |       |
| Use of endocrine therapy:                          |            |            | <0.001 |            |           | NA    |
| No                                                 | 28 (14.7)  | 15 (4.2)   |        | NA         | NA        | NA    |
| Yes                                                | 160 (83.8) | 339 (95.2) |        |            |           |       |
| Missing                                            | 3 (1.6)    | 2 (0.6)    |        |            |           |       |
| Type of endocrine therapy**:                       |            |            | 0.379  |            |           | NA    |
| Tamoxifen alone                                    | 71 (44.4)  | 145 (42.8) |        |            |           |       |
| Tamoxifen + LHRHa                                  | 47 (29.4)  | 116 (34.2) |        |            |           |       |
| LHRHa alone                                        | 5 (3.1)    | 3 (0.9)    |        | NA         | NA        | NA    |
| AI ± LHRHa                                         | 7 (4.4)    | 14 (4.1)   |        |            |           |       |
| Tamoxifen and AI (± LHRHa)                         | 29 (18.1)  | 58 (17.1)  |        |            |           |       |
| Missing                                            | 1 (0.6)    | 3 (0.9)    |        |            |           |       |
| Duration of endocrine therapy, median (IQR) months | 60 (36-60) | 60 (48-60) | 0.049  | NA         | NA        | NA    |

<sup>a</sup> Calculated after exclusion of missing values

\* Calculated among patients who received chemotherapy

\*\* Calculated among patients with hormone receptor-positive breast cancer who received endocrine therapy

Abbreviations: IQR, interquartile range; G, tumor grade; T, tumor size; N, nodal status; ER, estrogen receptor; PR, progesterone receptor; LHRHa, luteinizing hormone-releasing hormone agonists; AI, aromatase inhibitors.

**Supplementary Table 3. Use of prophylactic surgery comparing between patients with germline *BRCA1* and *BRCA2* pathogenic variants according to hormone receptor status.**

|                                                                     | Hormone receptor-positive             |                                       | P value <sup>a</sup> | Hormone receptor-negative             |                                      | P value <sup>a</sup> |
|---------------------------------------------------------------------|---------------------------------------|---------------------------------------|----------------------|---------------------------------------|--------------------------------------|----------------------|
|                                                                     | <i>BRCA1</i> cohort<br>N (%)<br>N=191 | <i>BRCA2</i> cohort<br>N (%)<br>N=356 |                      | <i>BRCA1</i> cohort<br>N (%)<br>N=617 | <i>BRCA2</i> cohort<br>N (%)<br>N=72 |                      |
| Prophylactic bilateral risk-reducing mastectomy:                    |                                       |                                       | 0.774                |                                       |                                      | 0.035                |
| No                                                                  | 86 (45.0)                             | 152 (42.7)                            |                      | 268 (43.4)                            | 23 (31.9)                            |                      |
| Yes                                                                 | 82 (42.9)                             | 155 (43.5)                            |                      | 273 (44.2)                            | 42 (58.3)                            |                      |
| Missing                                                             | 23 (12.0)                             | 49 (13.8)                             |                      | 76 (12.3)                             | 7 (9.7)                              |                      |
| Prophylactic bilateral risk-reducing salpingo-oophorectomy:         |                                       |                                       | 0.850                |                                       |                                      | 0.796                |
| No                                                                  | 82 (42.9)                             | 147 (41.3)                            |                      | 246 (39.9)                            | 29 (40.3)                            |                      |
| Yes                                                                 | 90 (47.1)                             | 170 (47.7)                            |                      | 300 (48.6)                            | 39 (54.2)                            |                      |
| Missing                                                             | 19 (9.9)                              | 39 (11.0)                             |                      | 71 (11.5)                             | 4 (5.6)                              |                      |
| Date of prophylactic bilateral risk-reducing salpingo-oophorectomy: |                                       |                                       |                      |                                       |                                      |                      |
| Not available, N (%)                                                | 106 (55.5)                            | 196 (55.1)                            | 0.928                | 335 (54.3)                            | 36 (50.0)                            | 0.533                |
| Median, months (IQR)*                                               | 38.5 (19.5-72.9)                      | 61.2 (27.1-96.3)                      | 0.012                | 56.8 (21.5-94.2)                      | 63.1 (24.3-98.3)                     | 0.701                |

<sup>a</sup> Calculated after exclusion of missing values

\*among patients with this information available

**Supplementary Table 4. Pattern of invasive disease-free survival events comparing between patients with germline *BRCA1* and *BRCA2* pathogenic variants according to hormone receptor status.**

|                                                 | Hormone receptor-negative             |                                      | P value* | Hormone receptor-positive             |                                       | P value* |
|-------------------------------------------------|---------------------------------------|--------------------------------------|----------|---------------------------------------|---------------------------------------|----------|
|                                                 | <i>BRCA1</i> cohort<br>N (%)<br>N=617 | <i>BRCA2</i> cohort<br>N (%)<br>N=72 |          | <i>BRCA1</i> cohort<br>N (%)<br>N=191 | <i>BRCA2</i> cohort<br>N (%)<br>N=356 |          |
| Follow-up, median (IQR)                         | 7.9 (5.6-10.7)                        | 7.7 (5.4-10.3)                       | 0.718    | 7.6 (5.2-10.4)                        | 8.0 (6.0-10.7)                        | 0.612    |
| No events                                       | 377 (61.1)                            | 48 (66.7)                            | 0.323    | 115 (60.2)                            | 214 (60.1)                            | 0.248    |
| Loco-regional recurrence                        | 40 (6.5)                              | 5 (6.9)                              | 0.835    | 14 (7.3)                              | 31 (8.7)                              | 0.774    |
| Distant recurrence +/- loco-regional recurrence | 56 (9.1)                              | 6 (8.3)                              | 0.804    | 28 (14.7)                             | 60 (16.9)                             | 0.685    |
| Second primary malignancy                       | 25 (4.1)                              | 3 (4.2)                              | 0.948    | 10 (5.2)                              | 5 (1.4)                               | 0.005    |
| Ovarian cancer                                  | 12 (1.9)                              | 0 (0.0)                              |          | 6 (3.1)                               | 1 (0.3)                               |          |
| Other                                           | 4 (0.7)                               | 1 (1.4)                              |          | 3 (1.6)                               | 3 (0.8)                               |          |
| Missing                                         | 9 (1.5)                               | 2 (2.8)                              |          | 1 (0.5)                               | 1 (0.3)                               |          |
| Second primary breast cancer                    | 114 (18.5)                            | 9 (12.5)                             | 0.185    | 23 (12.0)                             | 43 (12.1)                             | 0.579    |
| Death without any disease-free survival event   | 5 (0.8)                               | 1 (1.4)                              | 0.620    | 1 (0.5)                               | 3 (0.84)                              | 0.747    |

\*P-values for time-dependent events estimated by means of the Log-rank test

Abbreviations: IQR, interquartile range



**Supplementary Table 5. Disease-free survival comparing between patients with germline *BRCA1* and *BRCA2* pathogenic variants according to hormone receptor status.**

| <b>Disease-Free Survival</b> |                      |                                     |                      |                                     |                                                                 |                                            |
|------------------------------|----------------------|-------------------------------------|----------------------|-------------------------------------|-----------------------------------------------------------------|--------------------------------------------|
|                              | <b><i>BRCA1</i></b>  |                                     | <b><i>BRCA2</i></b>  |                                     |                                                                 |                                            |
|                              | Patients/<br>Events* | Survival<br>8-years (%)<br>(95% CI) | Patients/<br>Events* | Survival<br>8-years (%)<br>(95% CI) | Hazard<br>Ratio*<br><i>BRCA2</i> vs<br><i>BRCA1</i><br>(95% CI) | P-value<br>interaction<br><i>BRCA</i> / HR |
| <b>HR-</b>                   | 617/240              | 63.7<br>(59.4 - 67.7)               | 72/24                | 73.0<br>(60.5 - 82.1)               | 0.73<br>(0.48 - 1.13)                                           | 0.848                                      |
| <b>HR+</b>                   | 191/76               | 60.0<br>(51.7 - 67.3)               | 356/142              | 64.5<br>(58.8 - 69.6)               | 0.77<br>(0.58 - 1.03)                                           |                                            |
| <b>Total</b>                 | 808/316              | 62.8<br>(59.0 - 66.4)               | 428/166              | 65.9<br>(60.8 - 70.5)               | 0.76<br>(0.60 - 0.96)                                           |                                            |

\*: for all period of follow-up; Hazard Ratios adjusted by grade, nodal status, HER2, type of breast surgery, chemotherapy use, age, year of diagnosis and country

Abbreviations: CI, confidence intervals; HR, hazard ratio; HR+, hormone receptor-positive; HR-, hormone receptor-negative.

**Supplementary Table 6. Distant recurrence-free interval comparing between patients with germline *BRCA1* and *BRCA2* pathogenic variants according to hormone receptor status.**

| <b>Distant Recurrence-Free Interval</b> |                      |                                     |                      |                                     |                                                              |                                            |
|-----------------------------------------|----------------------|-------------------------------------|----------------------|-------------------------------------|--------------------------------------------------------------|--------------------------------------------|
|                                         | <i>BRCA1</i>         |                                     | <i>BRCA2</i>         |                                     | Hazard Ratio*<br><i>BRCA2</i> vs<br><i>BRCA1</i><br>(95% CI) | P-value<br>interaction<br><b>BRCA / HR</b> |
|                                         | Patients/<br>Events* | Survival<br>8-years (%)<br>(95% CI) | Patients/<br>Events* | Survival<br>8-years (%)<br>(95% CI) |                                                              |                                            |
| <b>HR-</b>                              | 617/63               | 90.0<br>(87.2-92.2)                 | 72/8                 | 91.2<br>(81.4-95.9)                 | 0.92<br>(0.43-1.95)                                          | 0.946                                      |
| <b>HR+</b>                              | 191/30               | 85.5<br>(79.4-89.9)                 | 356/63               | 82.3<br>(77.7-86.1)                 | 0.94<br>(0.60-1.48)                                          |                                            |
| <b>Total</b>                            | 808/93               | 88.9<br>(86.4-91.0)                 | 428/71               | 83.8<br>(79.7-87.1)                 | 0.94<br>(0.64-1.38)                                          |                                            |

\* for all period of follow-up; Hazard Ratios adjusted by grade, nodal status, HER2, type of breast surgery, chemotherapy use, age, year of diagnosis and country

Abbreviations: CI, confidence intervals; HR, hazard ratio; HR+, hormone receptor-positive; HR-, hormone receptor-negative.

**Supplementary Table 7. Overall survival comparing comparing between patients with germline *BRCA1* and *BRCA2* pathogenic variants according to hormone receptor status.**

| Overall Survival |                      |                                     |                      |                                     |                                                              |                                            |
|------------------|----------------------|-------------------------------------|----------------------|-------------------------------------|--------------------------------------------------------------|--------------------------------------------|
|                  | <i>BRCA1</i>         |                                     | <i>BRCA2</i>         |                                     | Hazard Ratio*<br><i>BRCA2</i> vs<br><i>BRCA1</i><br>(95% CI) | P-value<br>interaction<br><i>BRCA</i> / HR |
|                  | Patients/<br>Events* | Survival<br>8-years (%)<br>(95% CI) | Patients/<br>Events* | Survival<br>8-years (%)<br>(95% CI) |                                                              |                                            |
| <b>HR-</b>       | 617/86               | 86.9<br>(83.8 - 89.5)               | 72/10                | 87.2<br>(75.9 - 93.5)               | 0.80<br>(0.40 - 1.56)                                        | 0.624                                      |
| <b>HR+</b>       | 191/27               | 86.9<br>(80.6 - 91.2)               | 356/46               | 87.6<br>(83.1 - 91.0)               | 0.64<br>(0.39 - 1.05)                                        |                                            |
| <b>Total</b>     | 808/113              | 86.9<br>(84.2 - 89.2)               | 428/56               | 87.5<br>(83.5 - 90.7)               | 0.69<br>(0.46 - 1.04)                                        |                                            |

\*: for all period of follow-up; Hazard Ratios adjusted by grade, nodal status, HER2, type of breast surgery, chemotherapy use, age, year of diagnosis and country

Abbreviations: CI, confidence intervals; HR, hazard ratio; HR+, hormone receptor-positive; HR-, hormone receptor-negative.

**Supplementary Table 8. Patient, tumor and treatment characteristics comparing between patients with hormone receptor-positive and negative breast cancer.**

|                                      | <b>Hormone receptor-positive<br/>N (%)<br/>N=547</b> | <b>Hormone receptor-negative<br/>N (%)<br/>N=689</b> | <b>P value<sup>a</sup></b> |
|--------------------------------------|------------------------------------------------------|------------------------------------------------------|----------------------------|
| Country:                             |                                                      |                                                      | 0.115                      |
| Europe                               | 442 (80.8)                                           | 529 (76.8)                                           |                            |
| North America                        | 36 (6.6)                                             | 43 (6.2)                                             |                            |
| Latin America                        | 14 (2.6)                                             | 33 (4.8)                                             |                            |
| Israel                               | 55 (10.0)                                            | 84 (12.2)                                            |                            |
| Year at diagnosis:                   |                                                      |                                                      | 0.367                      |
| 2000-2004                            | 120 (21.9)                                           | 144 (20.9)                                           |                            |
| 2005-2008                            | 186 (34.0)                                           | 261 (37.9)                                           |                            |
| 2009-2012                            | 241 (44.1)                                           | 284 (41.2)                                           |                            |
| Age at diagnosis, median (IQR) years | 35 (32-38)                                           | 34 (30-37)                                           | 0.003                      |
| Age at diagnosis:                    |                                                      |                                                      | 0.001                      |
| ≤ 30 years                           | 96 (17.5)                                            | 174 (25.2)                                           |                            |
| 31-35 years                          | 185 (33.8)                                           | 239 (34.7)                                           |                            |
| 36-40 years                          | 266 (48.6)                                           | 276 (40.1)                                           |                            |
| Histology:                           |                                                      |                                                      | <0.001                     |
| Ductal carcinoma                     | 436 (79.7)                                           | 555 (80.5)                                           |                            |
| Lobular carcinoma                    | 37 (6.8)                                             | 2 (0.3)                                              |                            |
| Others                               | 29 (5.3)                                             | 78 (11.3)                                            |                            |
| Missing                              | 45 (8.2)                                             | 54 (7.8)                                             |                            |
| Tumor grade:                         |                                                      |                                                      | <0.001                     |
| G1                                   | 17 (3.1)                                             | 6 (0.9)                                              |                            |
| G2                                   | 179 (32.7)                                           | 71 (10.3)                                            |                            |
| G3                                   | 320 (58.5)                                           | 569 (82.6)                                           |                            |
| Missing                              | 31 (5.7)                                             | 43 (6.2)                                             |                            |
| Tumor size:                          |                                                      |                                                      | 0.079                      |
| T1 (≤ 2 cm)                          | 240 (43.9)                                           | 267 (38.7)                                           |                            |
| T2-T3-T4 (> 2 cm)                    | 298 (54.5)                                           | 408 (59.2)                                           |                            |
| Missing                              | 9 (1.6)                                              | 14 (2.0)                                             |                            |
| Nodal status:                        |                                                      |                                                      | <0.001                     |
| N0                                   | 247 (45.2)                                           | 420 (61.0)                                           |                            |
| N1-N2-N3                             | 293 (53.6)                                           | 258 (37.4)                                           |                            |
| Missing                              | 7 (1.3)                                              | 11 (1.6)                                             |                            |
| <i>BRCA</i> cohort:                  |                                                      |                                                      | <0.001                     |
| <i>BRCA1</i>                         | 191 (34.9)                                           | 617 (89.5)                                           |                            |
| <i>BRCA2</i>                         | 356 (65.1)                                           | 72 (10.5)                                            |                            |
| HER2 status:                         |                                                      |                                                      | 0.016                      |
| HER2 negative                        | 492 (90.0)                                           | 648 (94.0)                                           |                            |
| HER2 positive                        | 40 (7.3)                                             | 28 (4.1)                                             |                            |
| Missing                              | 15 (2.7)                                             | 13 (1.9)                                             |                            |
| Breast surgery:                      |                                                      |                                                      | <0.001                     |
| Breast conserving surgery            | 214 (39.1)                                           | 372 (54.0)                                           |                            |

|                                                    |              |            |        |
|----------------------------------------------------|--------------|------------|--------|
| Mastectomy                                         | 326 (59.6)   | 310 (45.0) |        |
| Missing                                            | 7 (1.3)      | 7 (1.0)    |        |
| Use of chemotherapy:                               |              |            | <0.001 |
| No                                                 | 45 (8.2)     | 12 (1.7)   |        |
| Yes                                                | 501 (91.6)   | 676 (98.1) |        |
| Missing                                            | 1 (0.2)      | 1 (0.2)    |        |
| Type of chemotherapy*:                             |              |            | 0.676  |
| Anthracycline- and taxane-based                    | 331 (60.5)   | 458 (66.5) |        |
| Anthracycline-based                                | 135 (24.7)   | 171 (24.8) |        |
| Taxane-based                                       | 16 (2.9)     | 15 (2.2)   |        |
| Others                                             | 10 (1.8)     | 15 (2.2)   |        |
| Missing                                            | 51 (9.3)     | 26 (3.8)   |        |
| Use of endocrine therapy**:                        |              |            | NA     |
| No                                                 | 43 (7.9)     | NA         | NA     |
| Yes                                                | 499 (91.2)   |            |        |
| Missing                                            | 5 (0.9)      |            |        |
| Type of endocrine therapy***:                      |              |            | NA     |
| Tamoxifen alone                                    | 216 (43.3)   |            | NA     |
| Tamoxifen + LHRHa                                  | 163 (32.7)   |            |        |
| LHRHa alone                                        | 8 (1.6)      |            |        |
| AI ± LHRHa                                         | 21 (4.2)     |            |        |
| Tamoxifen and AI (± LHRHa)                         | 87 (17.4)    |            |        |
| Missing                                            | 4 (0.8)      |            |        |
| Duration of endocrine therapy, median (IQR) months | 60 (43.5-60) | NA         | NA     |

<sup>a</sup> Calculated after exclusion of missing values

\* Calculated among patients who received chemotherapy

\*\* Calculated among patients with hormone receptor-positive breast cancer

\*\*\* Calculated among patients with hormone receptor-positive breast cancer who received endocrine therapy

Abbreviations: IQR, interquartile range; G, tumor grade; T, tumor size; N, nodal status; ER, estrogen receptor; PR, progesterone receptor; LHRHa, luteinizing hormone-releasing hormone agonists; AI, aromatase inhibitors.

**Supplementary Table 9. Use of prophylactic surgery comparing between patients with hormone receptor-positive and negative breast cancer.**

|                                                                     | <b>Hormone receptor-positive<br/>N (%)<br/>N=547</b> | <b>Hormone receptor-negative<br/>N (%)<br/>N=689</b> | <b>P value</b> |
|---------------------------------------------------------------------|------------------------------------------------------|------------------------------------------------------|----------------|
| Prophylactic bilateral risk-reducing mastectomy:                    |                                                      |                                                      | 0.501          |
| No                                                                  | 238 (43.5)                                           | 291 (42.2)                                           |                |
| Yes                                                                 | 237 (43.3)                                           | 315 (45.7)                                           |                |
| Missing                                                             | 72 (13.2)                                            | 83 (12.1)                                            |                |
| Prophylactic bilateral risk-reducing salpingo-oophorectomy:         |                                                      |                                                      | 0.504          |
| No                                                                  | 229 (41.9)                                           | 275 (39.9)                                           |                |
| Yes                                                                 | 260 (47.5)                                           | 339 (49.2)                                           |                |
| Missing                                                             | 58 (10.6)                                            | 75 (10.9)                                            |                |
| Date of prophylactic bilateral risk-reducing salpingo-oophorectomy: |                                                      |                                                      |                |
| Not available, N (%)                                                | 302 (55.2)                                           | 371 (53.9)                                           | 0.646          |
| Median, months (IQR)*                                               | 50.3 (22.6-88.8)                                     | 56.8 (21.8-94.2)                                     | 0.879          |

<sup>a</sup> Calculated after exclusion of missing values

\*among patients with this information available

**Supplementary Table 10. Survival outcomes comparing between patients with hormone receptor-positive and negative breast cancer.**

|             | <b>Hormone receptor-positive</b> |                                              | <b>Hormone receptor-negative</b> |                                              | <b>Hazard Ratio*<br/>HR+ vs HR-<br/>(95% CI)</b> |
|-------------|----------------------------------|----------------------------------------------|----------------------------------|----------------------------------------------|--------------------------------------------------|
|             | <b>Patients/<br/>Events*</b>     | <b>Survival<br/>8-years (%)<br/>(95% CI)</b> | <b>Patients/<br/>Events*</b>     | <b>Survival<br/>8-years (%)<br/>(95% CI)</b> |                                                  |
| <b>DFS</b>  | 547/218                          | 62.9<br>(58.3-67.2)                          | 689/264                          | 64.7<br>(60.6-68.4)                          | 1.06<br>(0.84-1.33)                              |
| <b>DRFI</b> | 547/93                           | 83.4<br>(79.8-86.4)                          | 689/71                           | 90.1<br>(87.5-92.2)                          | 1.39<br>(0.94-2.05)                              |
| <b>OS</b>   | 547/73                           | 87.3<br>(83.7-90.1)                          | 689/96                           | 87.0<br>(84.0-89.4)                          | 0.81<br>(0.55-1.20)                              |

\*: for all period of follow-up; Hazard Ratios adjusted by grade, nodal status, HER2, type of breast surgery, chemotherapy use, age, year of diagnosis and country

Abbreviations: DFS, disease-free survival; DRFI, distant recurrence-free interval; OS, overall survival; CI, confidence intervals; HR+, hormone receptor-positive; HR-, hormone receptor-negative.

**Supplementary Table 11. Patient, tumor and treatment characteristics comparing between patients with hormone receptor-positive and negative breast cancer (by including only patients for whom the 1% cut-off for estrogen and/or progesterone receptor expression in their tumor was used to define hormone receptor status).**

|                                      | <b>Hormone receptor-positive<br/>N (%)<br/>N=385</b> | <b>Hormone receptor-negative<br/>N (%)<br/>N=493</b> | <b>P value<sup>a</sup></b> |
|--------------------------------------|------------------------------------------------------|------------------------------------------------------|----------------------------|
| Country:                             |                                                      |                                                      | 0.124                      |
| Europe                               | 280 (72.7)                                           | 333 (67.6)                                           |                            |
| North America                        | 36 (9.4)                                             | 43 (8.7)                                             |                            |
| Latin America                        | 14 (3.6)                                             | 33 (6.7)                                             |                            |
| Israel                               | 55 (14.3)                                            | 84 (17.0)                                            |                            |
| Year at diagnosis:                   |                                                      |                                                      | 0.273                      |
| 2000-2004                            | 91 (23.6)                                            | 115 (23.3)                                           |                            |
| 2005-2008                            | 124 (32.2)                                           | 183 (37.1)                                           |                            |
| 2009-2012                            | 170 (44.2)                                           | 195 (39.6)                                           |                            |
| Age at diagnosis, median (IQR) years | 35 (32-38)                                           | 34 (31-37)                                           | 0.044                      |
| Age at diagnosis:                    |                                                      |                                                      | 0.016                      |
| ≤ 30 years                           | 66 (17.1)                                            | 122 (24.7)                                           |                            |
| 31-35 years                          | 135 (35.1)                                           | 170 (34.5)                                           |                            |
| 36-40 years                          | 184 (47.8)                                           | 201 (40.8)                                           |                            |
| Histology:                           |                                                      |                                                      | <0.001                     |
| Ductal carcinoma                     | 287 (74.6)                                           | 378 (76.7)                                           |                            |
| Lobular carcinoma                    | 26 (6.7)                                             | 2 (0.4)                                              |                            |
| Others                               | 27 (7.0)                                             | 61 (12.4)                                            |                            |
| Missing                              | 45 (11.7)                                            | 52 (10.5)                                            |                            |
| Tumor grade:                         |                                                      |                                                      | <0.001                     |
| G1                                   | 12 (3.1)                                             | 5 (1.0)                                              |                            |
| G2                                   | 128 (33.2)                                           | 48 (9.7)                                             |                            |
| G3                                   | 217 (56.4)                                           | 404 (82.0)                                           |                            |
| Missing                              | 28 (7.3)                                             | 36 (7.3)                                             |                            |
| Tumor size:                          |                                                      |                                                      | 0.071                      |
| T1 (≤ 2 cm)                          | 173 (44.9)                                           | 189 (38.4)                                           |                            |
| T2-T3-T4 (> 2 cm)                    | 207 (53.8)                                           | 293 (59.4)                                           |                            |
| Missing                              | 5 (1.3)                                              | 11 (2.2)                                             |                            |
| Nodal status:                        |                                                      |                                                      | <0.001                     |
| N0                                   | 161 (41.8)                                           | 292 (59.2)                                           |                            |
| N1-N2-N3                             | 217 (56.4)                                           | 191 (38.8)                                           |                            |
| Missing                              | 7 (1.8)                                              | 10 (2.0)                                             |                            |
| <i>BRCA</i> cohort:                  |                                                      |                                                      | <0.001                     |
| <i>BRCA1</i>                         | 142 (36.9)                                           | 434 (88.0)                                           |                            |
| <i>BRCA2</i>                         | 243 (63.1)                                           | 59 (12.0)                                            |                            |
| HER2 status:                         |                                                      |                                                      | 0.005                      |
| HER2 negative                        | 339 (88.1)                                           | 462 (93.7)                                           |                            |
| HER2 positive                        | 31 (8.0)                                             | 18 (3.7)                                             |                            |
| Missing                              | 15 (3.9)                                             | 13 (2.6)                                             |                            |



|                                                    |            |            |        |
|----------------------------------------------------|------------|------------|--------|
| Breast surgery:                                    |            |            | 0.001  |
| Breast conserving surgery                          | 147 (38.2) | 245 (49.7) |        |
| Mastectomy                                         | 231 (60.0) | 243 (49.3) |        |
| Missing                                            | 7 (1.8)    | 5 (1.0)    |        |
| Use of chemotherapy:                               |            |            | <0.001 |
| No                                                 | 40 (10.4)  | 11 (2.2)   |        |
| Yes                                                | 344 (89.3) | 481 (97.6) |        |
| Missing                                            | 1 (0.3)    | 1 (0.2)    |        |
| Type of chemotherapy*:                             |            |            | 0.748  |
| Anthracycline- and taxane-based                    | 225 (65.4) | 311 (64.7) |        |
| Anthracycline-based                                | 88 (25.6)  | 129 (26.8) |        |
| Taxane-based                                       | 13 (3.8)   | 12 (2.5)   |        |
| Others                                             | 9 (2.6)    | 13 (2.7)   |        |
| Missing                                            | 9 (2.6)    | 16 (3.3)   |        |
| Use of endocrine therapy**:                        |            |            | NA     |
| No                                                 | 29 (7.5)   | NA         | NA     |
| Yes                                                | 351 (91.2) |            |        |
| Missing                                            | 5 (1.3)    |            |        |
| Type of endocrine therapy***:                      |            |            | NA     |
| Tamoxifen alone                                    | 122 (34.7) |            |        |
| Tamoxifen + LHRHa                                  | 144 (41.0) |            |        |
| LHRHa alone                                        | 7 (2.0)    | NA         | NA     |
| AI ± LHRHa                                         | 14 (4.0)   |            |        |
| Tamoxifen and AI (± LHRHa)                         | 62 (17.7)  |            |        |
| Missing                                            | 2 (0.6)    |            |        |
| Duration of endocrine therapy, median (IQR) months | 60 (47-60) | NA         | NA     |

<sup>a</sup> Calculated after exclusion of missing values

\* Calculated among patients who received chemotherapy

\*\* Calculated among patients with hormone receptor-positive breast cancer

\*\*\* Calculated among patients with hormone receptor-positive breast cancer who received endocrine therapy

Abbreviations: IQR, interquartile range; G, tumor grade; T, tumor size; N, nodal status; ER, estrogen receptor; PR, progesterone receptor; LHRHa, luteinizing hormone-releasing hormone agonists; AI, aromatase inhibitors.

**Supplementary Table 12. Use of prophylactic surgery comparing between patients with hormone receptor-positive and negative breast cancer (by including only patients for whom the 1% cut-off for estrogen and/or progesterone receptor expression in their tumor was used to define hormone receptor status).**

|                                                                     | <b>Hormone receptor-positive<br/>N (%)<br/>N=385</b> | <b>Hormone receptor-negative<br/>N (%)<br/>N=493</b> | <b>P<br/>value</b> |
|---------------------------------------------------------------------|------------------------------------------------------|------------------------------------------------------|--------------------|
| Prophylactic bilateral risk-reducing mastectomy:                    |                                                      |                                                      | 0.530              |
| No                                                                  | 183 (47.5)                                           | 229 (46.5)                                           |                    |
| Yes                                                                 | 179 (46.5)                                           | 246 (49.9)                                           |                    |
| Missing                                                             | 23 (6.0)                                             | 18 (3.6)                                             |                    |
| Prophylactic bilateral risk-reducing salpingo-oophorectomy:         |                                                      |                                                      | 0.678              |
| No                                                                  | 167 (43.4)                                           | 221 (44.8)                                           |                    |
| Yes                                                                 | 208 (54.0)                                           | 259 (52.6)                                           |                    |
| Missing                                                             | 10 (2.6)                                             | 13 (2.6)                                             |                    |
| Date of prophylactic bilateral risk-reducing salpingo-oophorectomy: |                                                      |                                                      |                    |
| Not available, N (%)                                                | 191(49.6)                                            | 256 (51.9)                                           | 0.497              |
| Median, months (IQR)*                                               | 51.2 (20.5-92.2)                                     | 59.5 (19.5-99.2)                                     | 0.504              |

<sup>a</sup> Calculated after exclusion of missing values

\*among patients with this information available

**Table 13. Pattern of invasive disease-free survival events according to hormone receptor status (by including only patients for whom the 1% cut-off for estrogen and/or progesterone receptor expression in their tumor was used to define hormone receptor status).**

|                                                 | <b>Hormone receptor-positive<br/>N (%) n=385 (56.1)</b> | <b>Hormone receptor-negative<br/>N (%) n=493 (43.9)</b> | <b>P value<sup>a</sup></b> |
|-------------------------------------------------|---------------------------------------------------------|---------------------------------------------------------|----------------------------|
| Follow-up, median (IQR)                         | 8.0 (6.0-10.9)                                          | 8.0 (5.6-10.9)                                          | 0.600                      |
| No events                                       | 230 (59.7)                                              | 309 (62.7)                                              | 0.566                      |
| Loco-regional recurrence                        | 25 (6.5)                                                | 27 (5.5)                                                | 0.562                      |
| Distant recurrence +/- loco-regional recurrence | 69 (17.9)                                               | 41 (8.3)                                                | <0.001                     |
| Second primary malignancy                       | 11 (2.9)                                                | 19 (3.9)                                                | 0.361                      |
| Ovarian cancer                                  | 6 (1.6)                                                 | 7 (1.4)                                                 |                            |
| Other                                           | 3 (0.8)                                                 | 5 (1.1)                                                 |                            |
| Missing                                         | 2 (0.5)                                                 | 7 (1.4)                                                 |                            |
| Second primary breast cancer                    | 48 (12.5)                                               | 91 (18.5)                                               | 0.014                      |
| Death without any disease-free survival event   | 2 (0.5)                                                 | 6 (1.2)                                                 | 0.257                      |

<sup>a</sup> P-values for time-dependent events estimated by means of the Log-rank test

Abbreviations: IQR, interquartile range.

**Supplementary Table 14. Survival outcomes comparing between patients with hormone receptor-positive and negative breast cancer (by including only patients for whom the 1% cut-off for estrogen and/or progesterone receptor expression in their tumor was used to define hormone receptor status).**

|             | Hormone receptor-positive |                                     | Hormone receptor-negative |                                     | Hazard Ratio*<br>HR+ vs HR-<br>(95% CI) |
|-------------|---------------------------|-------------------------------------|---------------------------|-------------------------------------|-----------------------------------------|
|             | Patients/<br>Events*      | Survival<br>8-years (%)<br>(95% CI) | Patients/<br>Events*      | Survival<br>8-years (%)<br>(95% CI) |                                         |
| <b>DFS</b>  | 385/155                   | 63.7 (58.2-68.6)                    | 493/184                   | 66.8 (62.0-71.0)                    | 1.01 (0.77-1.33)                        |
| <b>DRFI</b> | 385/71                    | 82.3 (77.8-85.9)                    | 493/49                    | 90.7 (87.6-93.1)                    | 1.53 (0.98-2.40)                        |
| <b>OS</b>   | 385/56                    | 85.8 (81.5-89.2)                    | 493/70                    | 86.8 (83.2-89.6)                    | 0.88 (0.56-1.37)                        |

\*: for all period of follow-up; Hazard Ratios adjusted by grade, nodal status, HER2, type of breast surgery, chemotherapy use, age, year of diagnosis and country

Abbreviations: DFS, disease-free survival; DRFI, distant recurrence-free interval; OS, overall survival; CI, confidence intervals; HR+, hormone receptor-positive; HR-, hormone receptor-negative.

**Supplementary Figure 2. Comparison between patients with hormone receptor-positive and negative disease: Epanechnikov Kernel-Smoothed annual hazards of recurrence overall.**

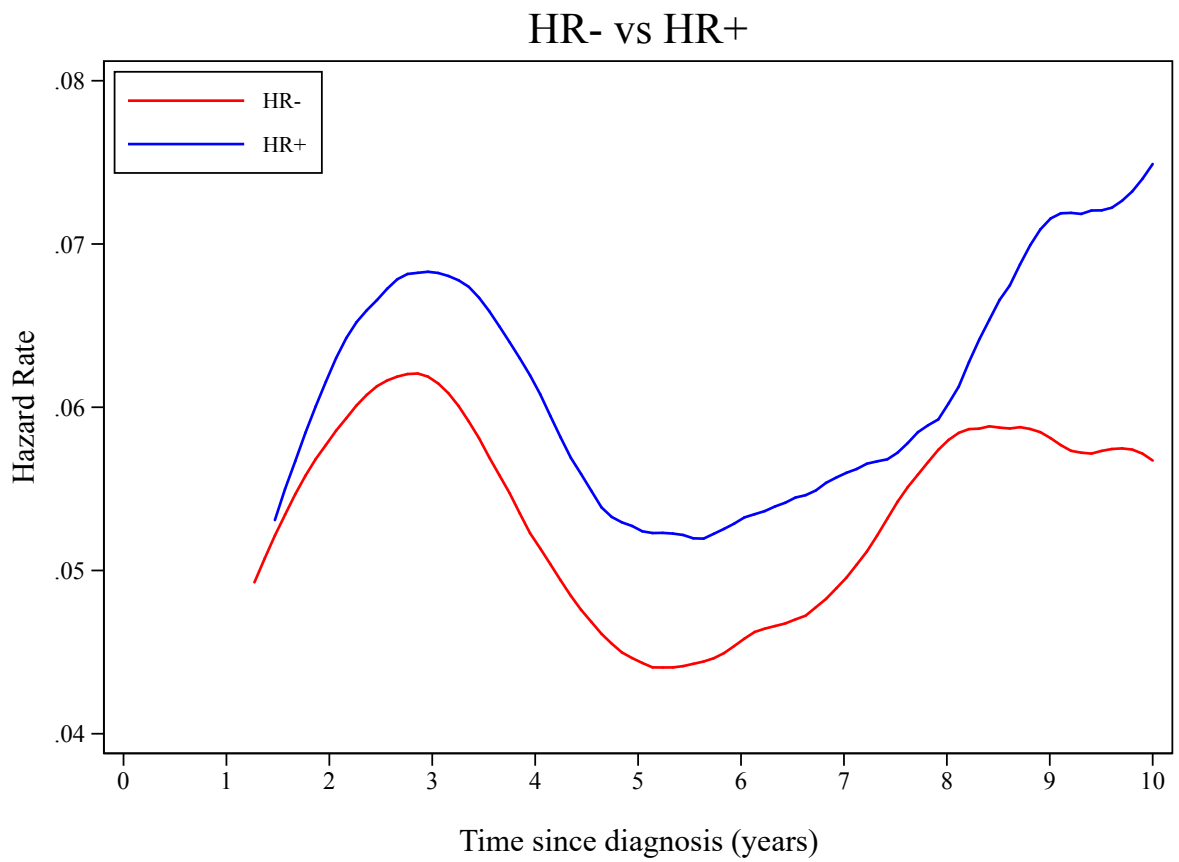

**HR+ = hormone receptor-positive; HR- = hormone receptor-negative.**

**Supplementary Figure 3. Comparison between patients with hormone receptor-positive and negative disease: Disease-free survival.**

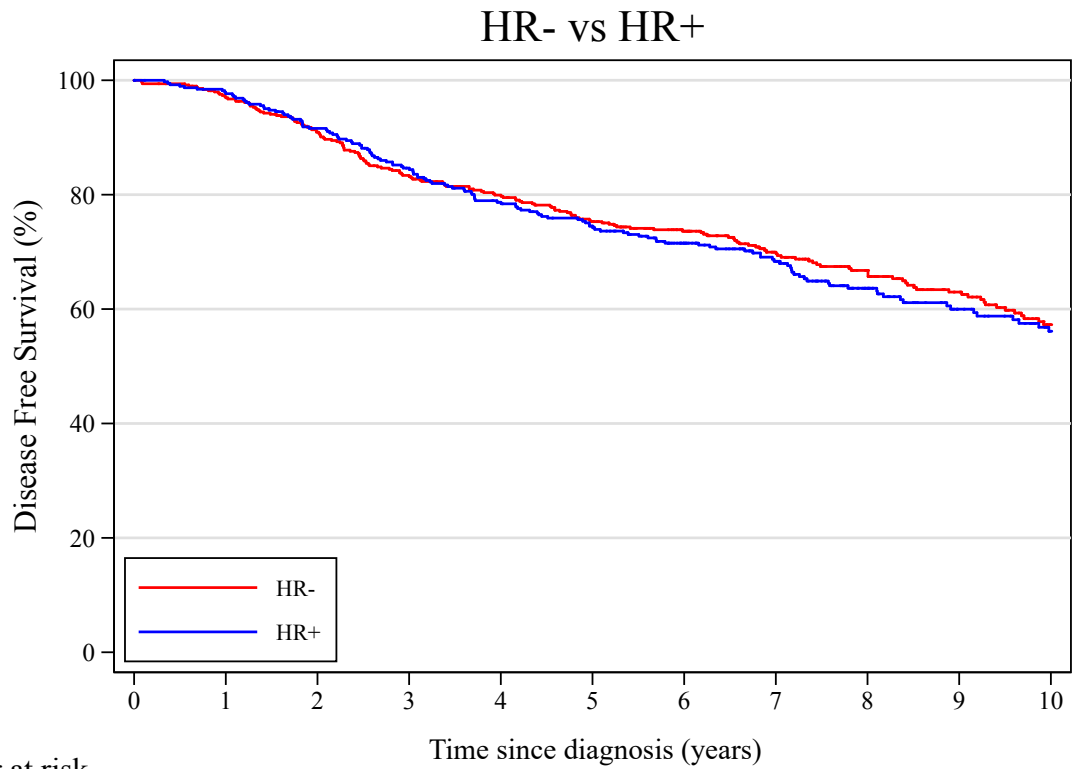

| Number at risk |     | Time since diagnosis (years) |     |     |     |     |     |     |     |     |     |
|----------------|-----|------------------------------|-----|-----|-----|-----|-----|-----|-----|-----|-----|
|                |     | 0                            | 1   | 2   | 3   | 4   | 5   | 6   | 7   | 8   | 9   |
| HR-            | 493 | 473                          | 435 | 393 | 368 | 333 | 288 | 231 | 190 | 150 | 106 |
| HR+            | 385 | 375                          | 344 | 315 | 286 | 261 | 221 | 186 | 135 | 101 | 80  |

**HR+ = hormone receptor-positive; HR- = hormone receptor-negative.**

**Supplementary Figure 4. Comparison between patients with hormone receptor-positive and negative disease: Distant recurrence-free interval.**

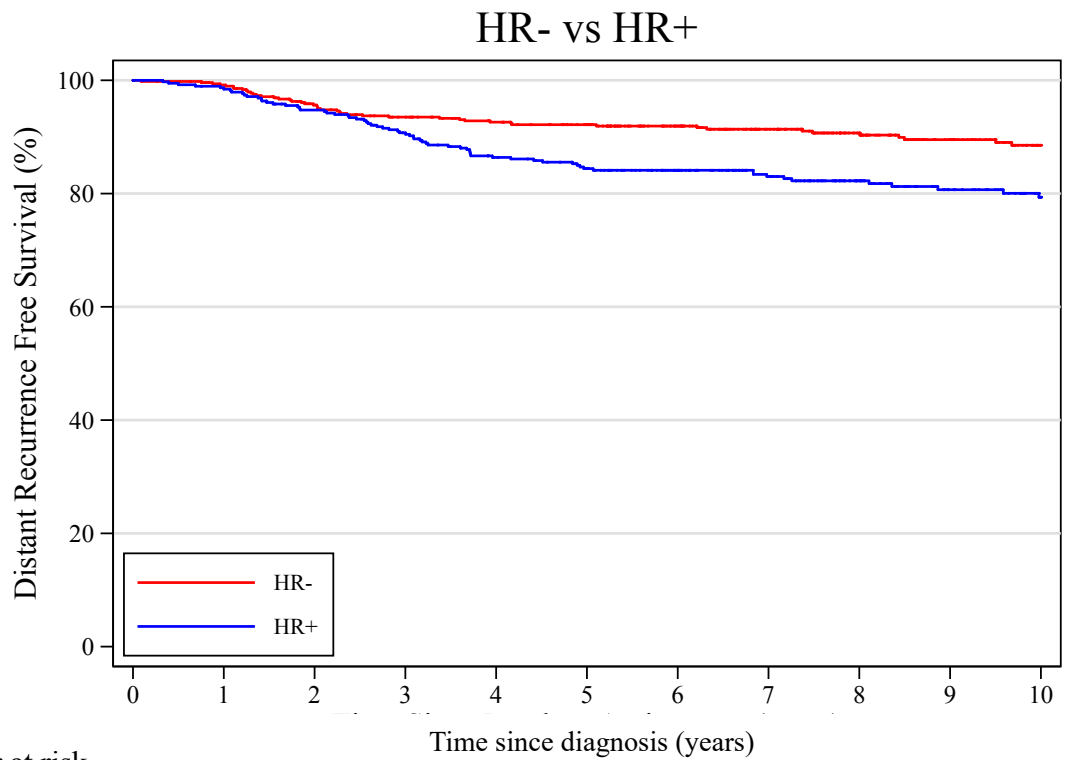

| Number at risk |     | Time since diagnosis (years) |     |     |     |     |     |     |     |     |     |    |
|----------------|-----|------------------------------|-----|-----|-----|-----|-----|-----|-----|-----|-----|----|
|                |     | 0                            | 1   | 2   | 3   | 4   | 5   | 6   | 7   | 8   | 9   | 10 |
| HR-            | 493 | 480                          | 450 | 430 | 413 | 394 | 344 | 293 | 247 | 204 | 163 |    |
| HR+            | 385 | 378                          | 355 | 337 | 312 | 294 | 259 | 224 | 176 | 139 | 112 |    |

**HR+ = hormone receptor-positive; HR- = hormone receptor-negative.**

**Supplementary Figure 5. Comparison between patients with hormone receptor-positive and negative disease: Overall survival.**

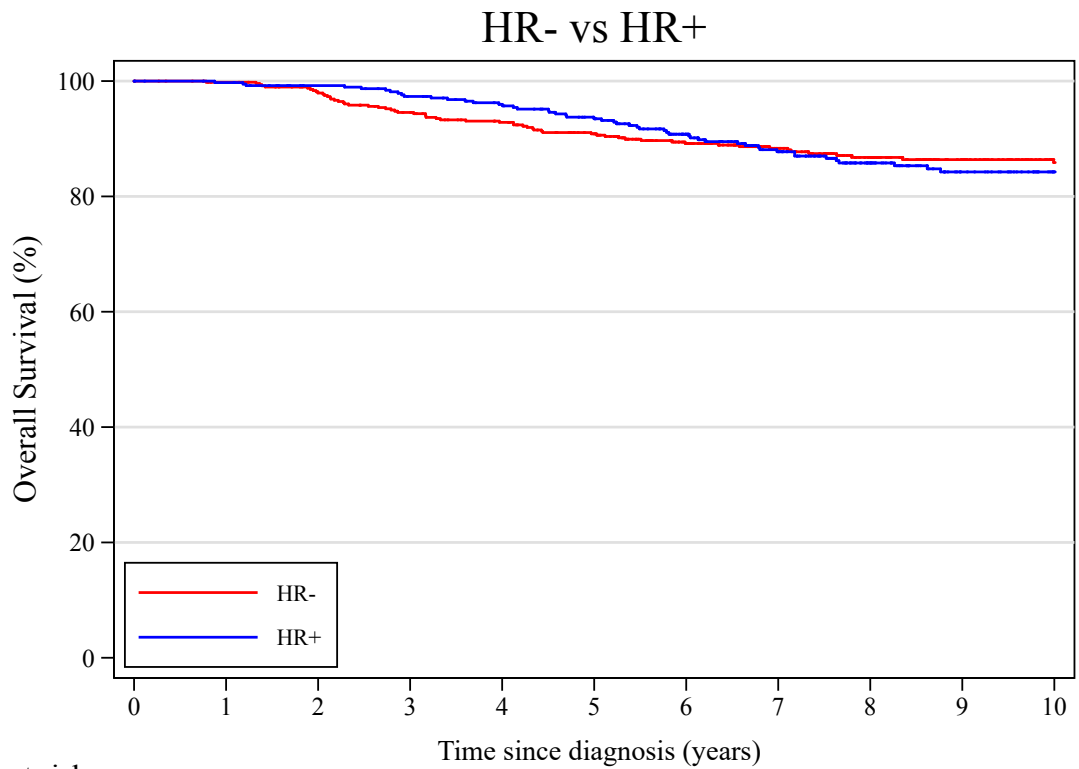

| Number at risk |     | 0   | 1   | 2   | 3   | 4   | 5   | 6   | 7   | 8   | 9   | 10 |
|----------------|-----|-----|-----|-----|-----|-----|-----|-----|-----|-----|-----|----|
| HR-            | 493 | 486 | 467 | 445 | 426 | 401 | 350 | 298 | 251 | 209 | 169 |    |
| HR+            | 385 | 382 | 371 | 361 | 348 | 329 | 286 | 244 | 192 | 149 | 124 |    |

**HR+ = hormone receptor-positive; HR- = hormone receptor-negative.**
